# Supplementary material for: New Therapeutic Candidates for the Treatment of Malassezia pachydermatis -Associated Infections
Source: PubMed Central journal article supplement (PMC7078309; doi:10.1038/s41598-020-61729-1), 2020-03-17
Supplement: 41598_2020_61729_MOESM1_ESM.pdf [file 41598_2020_61729_MOESM1_ESM.pdf]

# NEW THERAPEUTIC CANDIDATES FOR THE TREATMENT OF *Malassezia*

## *pachydermatis* -ASSOCIATED INFECTIONS

Angie Sastoque, Sergio Triana, Kevin Ehemann, Lina Suarez, Silvia Restrepo, Han Wösten, Hans de Cock, Miguel Fernández-Niño, Andrés González Barrios, Adriana Marcela Celis Ramírez

### SUPPLEMENTARY INFORMATION

**Supplementary Table S1:** Biomass composition used as objective function in the metabolic network<sup>28</sup> with the metabolites with pathologies emphasized.

| KEGG ID | Coefficient | Compound          | METANETX ID | Pathology |
|---------|-------------|-------------------|-------------|-----------|
| C00001  | -59,276     | H2O               | MNXM2       | NO        |
| C00002  | -59,276     | atp               | MNXM3       | NO        |
| C00965  | -11,348     | 1,3-beta-D-Glucan | MNXM6492    | NO        |
| C00096  | -0.8079     | GDP-mannose       | MNXM82      | NO        |
| C00369  | -0.5185     | starch/glycogen   | MNXM93732   | NO        |
| C00041  | -0.4588     | ala-L             | MNXM32      | NO        |
| C00025  | -0.3018     | glu-L             | MNXM89557   | NO        |
| C00049  | -0.2975     | asp-L             | MNXM42      | NO        |
| C00123  | -0.2964     | leu-L             | MNXM140     | NO        |
| C00037  | -0.2904     | gly               | MNXM29      | NO        |
| C00047  | -0.2862     | lys-L             | MNXM78      | YES       |
| C00183  | -0.2646     | val-L             | MNXM199     | YES       |
| C00407  | -0.1927     | ile-L             | MNXM231     | YES       |
| C00188  | -0.1914     | thr-L             | MNXM142     | YES       |
| C00065  | -0.1854     | ser-L             | MNXM53      | YES       |
| C00148  | -0.1647     | pro-L             | MNXM114     | YES       |
| C00062  | -0.1607     | arg-L             | MNXM70      | YES       |
| C00079  | -0.1339     | phe-L             | MNXM97      | YES       |
| C00064  | -0.1054     | gln-L             | MNXM37      | YES       |
| C00082  | -0.102      | tyr-L             | MNXM76      | NO        |
| C00152  | -0.1017     | asn-L             | MNXM147     | NO        |
| C00135  | -0.0663     | his-L             | MNXM134     | YES       |
| C00105  | -0.0599     | ump               | MNXM80      | YES       |
| C00073  | -0.0507     | met-L             | MNXM61      | YES       |
| C00144  | -0.046      | amp               | MNXM113     | YES       |
| C00020  | -0.046      | gmp               | MNXM14      | NO        |
| C00055  | -0.0447     | cmp               | MNXM31      | NO        |

|        |            |                |           |     |
|--------|------------|----------------|-----------|-----|
| C00078 | -0.0284    | trp-L          | MNXM94    | YES |
| C01083 | -0.0234    | tre            | MNXM198   | YES |
| C00059 | -0.02      | SO4            | MNXM58    | NO  |
| C00097 | -0.0066    | cys-L          | MNXM55    | YES |
| C00364 | -0.0036    | damp           | MNXM257   | YES |
| C00360 | -0.0036    | dtmp           | MNXM432   | NO  |
| C00239 | -0.0024    | dcmp           | MNXM266   | NO  |
| C00362 | -0.0024    | dgmp           | MNXM546   | NO  |
| C05437 | -0.0015    | zymst          | MNXM574   | YES |
| C00255 | -0.00099   | rib            | MNXM270   | YES |
| C01694 | -0.0007    | ergst          | MNXM922   | NO  |
| C00010 | -0.000001  | NAD            | MNXM12    | NO  |
| C00575 | -0.000001  | CoA            | MNXM243   | NO  |
| C00461 | -0.000001  | FAD            | MNXM46301 | NO  |
| C00051 | -0.000001  | gthrd          | MNXM57    | YES |
| C00101 | -0.000001  | thf            | MNXM79    | NO  |
| C00003 | -0.000001  | chitin         | MNXM8     | NO  |
| C00016 | -0.000001  | camp           | MNXM96415 | NO  |
| C00035 | 0.8079     | GDP            | MNXM30    | NO  |
| C00008 | 59,276     | ADP            | MNXM7     | NO  |
| C00009 | 59,305     | Orthophosphate | MNXM9     | NO  |
| C00080 | 11,740,002 | H              | MNXM1     | NO  |

10 **Supplementary Table S2.** Reactions added to the network after the manual curation.

| ID        | Compartment | Equation                                                                               | Description                                                                                                                                                                       | Source        |
|-----------|-------------|----------------------------------------------------------------------------------------|-----------------------------------------------------------------------------------------------------------------------------------------------------------------------------------|---------------|
| MNXR3255  | Cytoplasm   | 1 MNXM1036 + 4 MNXM2 + 1 MNXM39 + 3 MNXM5 = 2 MNXM1 + 3 MNXM4 + 1 MNXM482 + 3 MNXM6    | 1 `4,4-dimethyl-5alpha-cholesta-8,14,24-trien-3beta-ol` + 4 `H2O` + 1 `formate` + 3 `NADP(+)` = 2 `H(+)` + 3 `O2` + 1 `lanosterol` + 3 `NADPH`                                    | rhea:25286    |
| MNXR3256  | Cytoplasm   | 1 MNXM130 = 1 MNXM482                                                                  | 1 `(S)-2,3-epoxysqualene` = 1 `lanosterol`                                                                                                                                        | rhea:14621    |
| MNXR56252 | Cytoplasm   | 1 MNXM1804 + 1 MNXM5 = 1 MNXM1 + 1 MNXM36392 + 1 MNXM6                                 | 1 `4alpha-methyl-5alpha-cholesta-8,24-dien-3beta-ol` + 1 `NADP(+)` = 1 `H(+)` + 1 `4alpha-methyl-5alpha-cholesta-8,24-dien-3-one` + 1 `NADPH`                                     | rhea:36379    |
| MNXR65591 | Cytoplasm   | 1 MNXM13 + 1 MNXM36392 + 1 MNXM6 = 1 MNXM37762 + 1 MNXM5                               | 1 `CO2` + 1 `4alpha-methyl-5alpha-cholesta-8,24-dien-3-one` + 1 `NADPH` = 1 `4alpha-carboxyl-4beta-methyl-5alpha-cholesta-8,24-dien-3beta-ol` + 1 `NADP(+)`                       | rhea:33447    |
| MNXR65590 | Cytoplasm   | 2 MNXM1 + 3 MNXM4 + 3 MNXM6 + 1 MNXM913 = 4 MNXM2 + 1 MNXM37762 + 3 MNXM5              | 2 `H(+)` + 3 `O2` + 3 `NADPH` + 1 `4,4-dimethyl-5alpha-cholesta-8,24-dien-3beta-ol` = 4 `H2O` + 1 `4alpha-carboxyl-4beta-methyl-5alpha-cholesta-8,24-dien-3beta-ol` + 3 `NADP(+)` | rhea:33443    |
| MNXR29289 | Cytoplasm   | 1 MNXM1 + 1 MNXM10 + 1 MNXM2563 + 1 MNXM53 = 1 MNXM2 + 1 MNXM2623 + 1 MNXM29 + 1 MNXM8 | 1 `H(+)` + 1 `NADH` + 1 `tetrahydropteroyltri-L-glutamate` + 1 `L-serine` = 1 `H2O` + 1 `5-methyltetrahydropteroyltri-L-glutamate` + 1 `glycine` + 1 `NAD(+)`                     | seed:rxn12215 |
| MNXR69079 | Cytoplasm   | 1 MNXM1 + 1 MNXM1617 + 1 MNXM2 = 1 MNXM245                                             | 1 `H(+)` + 1 `1-pyrroline-5-carboxylate` + 1 `H2O` = 1 `L-glutamate 5-semialdehyde`                                                                                               | rhea:28234    |
| MNXR31743 | Cytoplasm   | 1 MNXM20 + 1 MNXM231 = 1 MNXM439 + 1 MNXM89557                                         | 1 `2-oxoglutarate` + 1 `L-isoleucine` = 1 `(S)-3-methyl-2-oxopentanoate` + 1 `L-glutamate`                                                                                        | rhea:24801    |
| MNXR3145  | Cytoplasm   | 1 MNXM1 + 1 MNXM426 + 1 MNXM6 = 1 MNXM5 + 1 MNXM734                                    | 1 `H(+)` + 1 `2-acetolactate` + 1 `NADPH` = 1 `NADP(+)` + 1 `2,3-dihydroxy-3-methylbutanoate`                                                                                     | kegg:R03051   |
| MNXR32586 | Cytoplasm   | 1 MNXM199 + 1 MNXM20 = 1 MNXM238 + 1 MNXM89557                                         | 1 `L-valine` + 1 `2-oxoglutarate` = 1 `3-methyl-2-oxobutanoate` + 1 `L-glutamate`                                                                                                 | rhea:24813    |

|           |              |                                                                               |                                                                                                                                                                                                                  |                  |
|-----------|--------------|-------------------------------------------------------------------------------|------------------------------------------------------------------------------------------------------------------------------------------------------------------------------------------------------------------|------------------|
| MNXR56338 | Cytoplasm    | 1 MNXM2 + 1 MNXM20 + 1 MNXM268 = 1 MNXM2 + 1 MNXM263 + 1 MNXM89557            | 1 `H2O` + 1 `2-oxoglutarate` + 1 `L-2-aminoadipate` = 1 `H2O` + 1 `2-oxoadipate` + 1 `L-glutamate`                                                                                                               | biopath:RXN01183 |
| MNXR13125 | Cytoplasm    | 1 MNXM2378 + 1 MNXM77 = 1 MNXM417                                             | 1 `glyceraldehyde 3-phosphate` + 1 `glycerone phosphate` = 1 `D-fructose 1,6-bisphosphate`                                                                                                                       | rhea:14729       |
| MNXR81572 | Mitochondria | 1 MNXM11 + 1 MNXM33 = 1 MNXM1 + 1 MNXM119 + 1 MNXM3                           | 1 `diphosphate` + 1 `FAD` = 1 `H(+)` + 1 `FMN` + 1 `ATP`                                                                                                                                                         | rhea:17237       |
| MNXR10784 | Cytoplasm    | 1 MNXM26 + 1 MNXM320 = 1 MNXM2 + 1 MNXM497                                    | 1 `acetate` + 1 `phenol` = 1 `H2O` + 1 `phenylacetate`                                                                                                                                                           | rhea:17309       |
| MNXR84842 | Cytoplasm    | 1 MNXM1 + 1 MNXM2415 + 1 MNXM45 = 1 MNXM320 + 1 MNXM49                        | 1 `H(+)` + 1 `phenyl sulfate` + 1 `adenosine 3',5'-bisphosphate` = 1 `phenol` + 1 `3'-phosphoadenylyl sulfate`                                                                                                   | kegg:R01242      |
| MNXR3900  | Cytoplasm    | 1 MNXM1 + 1 MNXM11 + 1 MNXM432 = 1 MNXM2 + 1 MNXM286                          | 1 `H(+)` + 1 `diphosphate` + 1 `dAMP` = 1 `H2O` + 1 `dATP`                                                                                                                                                       | rhea:28334       |
| MNXR3902  | Cytoplasm    | 1 MNXM1 + 1 MNXM11 + 1 MNXM257 = 1 MNXM2 + 1 MNXM394                          | 1 `H(+)` + 1 `diphosphate` + 1 `dTTP` = 1 `H2O` + 1 `dTTP`                                                                                                                                                       | rhea:28534       |
| MNXR3898  | Cytoplasm    | 1 MNXM1 + 1 MNXM11 + 1 MNXM266 = 1 MNXM2 + 1 MNXM360                          | 1 `H(+)` + 1 `diphosphate` + 1 `dCMP` = 1 `H2O` + 1 `dCTP`                                                                                                                                                       | rhea:22636       |
| MNXR69877 | Cytoplasm    | 1 MNXM1 + 1 MNXM6 + 1 MNXM89557 + 1 MNXM89905 = 1 MNXM2 + 1 MNXM384 + 1 MNXM5 | 1 `H(+)` + 1 `NADPH` + 1 `L-glutamate` + 1 `(S)-2-amino-6-oxohexanoate` = 1 `H2O` + 1 `L-saccharopine` + 1 `NADP(+)`                                                                                             | rhea:10020       |
| MNXR7299  | Cytoplasm    | 1 MNXM114 + 1 MNXM5 = 2 MNXM1 + 1 MNXM1617 + 1 MNXM6                          | 1 `L-proline` + 1 `NADP(+)` = 2 `H(+)` + 1 `1-pyrroline-5-carboxylate` + 1 `NADPH`                                                                                                                               | rhea:14109       |
| MNXR29715 | Cytoplasm    | 1 MNXM10287 = 1 MNXM1397                                                      | 1 1-(5-phospho-D-ribose)-5-[(5-phospho-D-ribosylamino)methylideneamino]imidazole-4-carboxamide(4-) = 1 5-[(5-phospho-1-deoxy-D-ribulos-1-ylamino)methylideneamino]-1-(5-phospho-D-ribose)imidazole-4-carboxamide | seed:rxn12992    |

12 **Supplementary Table S3.** Reactions which upper and lower bounds were modified after the  
13 manual curation.

| ID        | Compartment  | Old bounds | New bounds |
|-----------|--------------|------------|------------|
| MNXR74425 | Mitochondria | -1000;1000 | 0;1000     |
| MNXR74425 | Cytoplasm    | -1000;1000 | 0;1000     |
| MNXR74186 | Cytoplasm    | -1000;1000 | 0;1000     |
| MNXR70061 | Cytoplasm    | -1000;1000 | 0;1000     |
| MNXR69932 | Cytoplasm    | -1000;1000 | 0;1000     |
| MNXR68605 | Cytoplasm    | -1000;1000 | 0;1000     |
| MNXR68447 | Cytoplasm    | -1000;1000 | 0;1000     |
| MNXR66179 | Cytoplasm    | -1000;1000 | 0;1000     |
| MNXR53521 | Cytoplasm    | -1000;1000 | 0;1000     |
| MNXR4195  | Cytoplasm    | -1000;1000 | 0;1000     |
| MNXR39679 | Mitochondria | -1000;1000 | 0;1000     |
| MNXR39679 | Cytoplasm    | -1000;1000 | 0;1000     |
| MNXR35885 | Peroxisome   | -1000;1000 | 0;1000     |
| MNXR35885 | Mitochondria | -1000;1000 | 0;1000     |
| MNXR35885 | Cytoplasm    | -1000;1000 | 0;1000     |
| MNXR2911  | Cytoplasm    | -1000;1000 | 0;1000     |
| MNXR13313 | Cytoplasm    | -1000;1000 | 0;1000     |
| MNXR13031 | Cytoplasm    | -1000;1000 | 0;1000     |

14

15 **Supplementary Table S4.** Primers sequences for cassettes designed in this study.

| <b>NAME</b> | <b>SEQUENCE</b>                      | <b>LENGTH (bp)</b> |
|-------------|--------------------------------------|--------------------|
| HCS-F       | taaggcctctgtcgaATGGCGGGTGTAGGCG      | 31                 |
| HCS_R       | cagaattcgcaagctTTACGCATCCCACATAGCCCG | 36                 |
| HSD_F       | taaggcctctgtcgaATGGAGTCTGTGGTACAGC   | 34                 |
| HSD_R       | cagaattcgcaagctTTAGCCACGGCGCTCC      | 31                 |

16

17

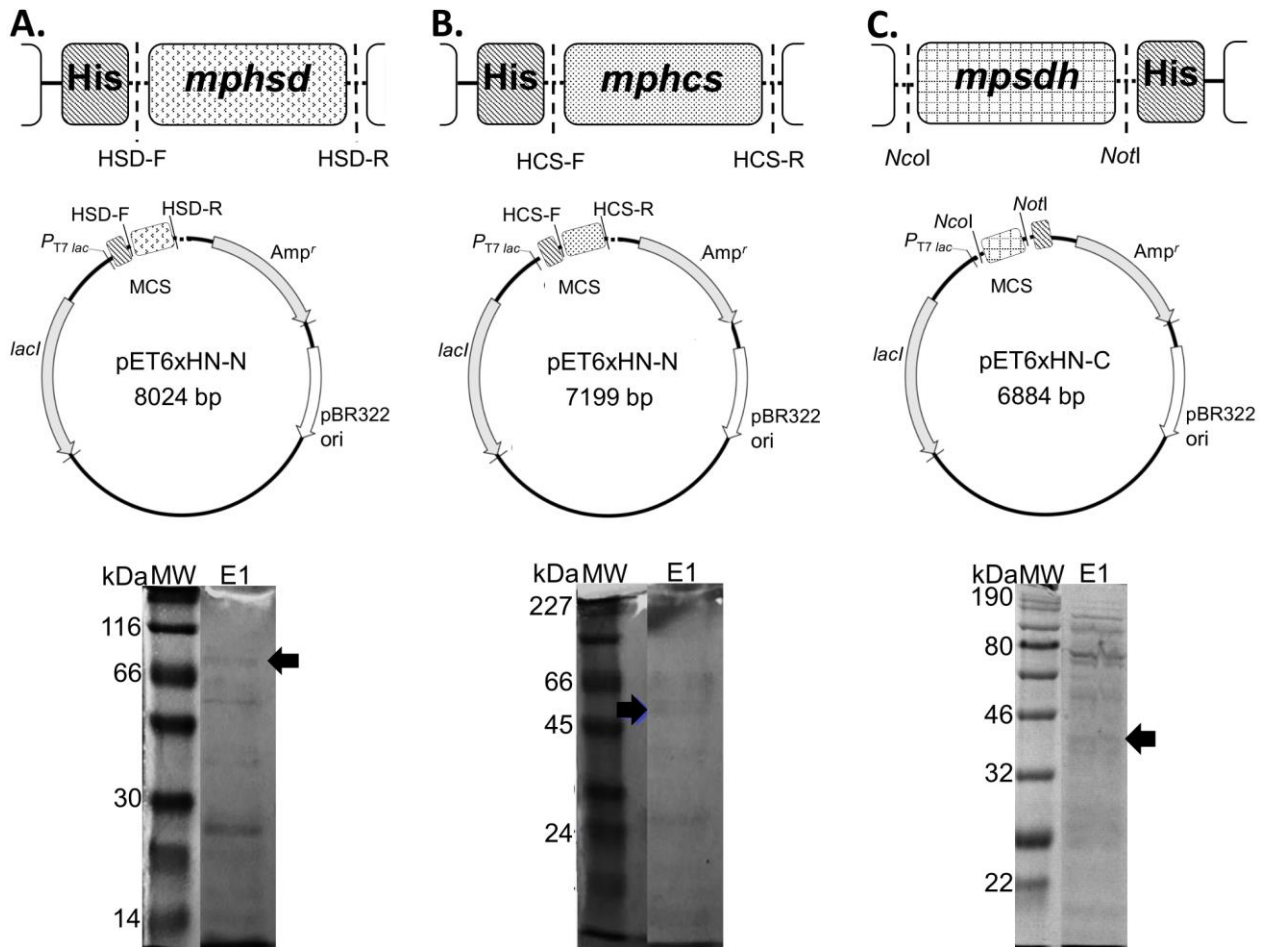

18  
 19  
 20  
 21  
 22  
 23  
 24  
 25  
 26  
 27  
 28  
 29  
 30

**Supplementary Figure S1.** Expression cassettes and cropped pictures of SDS-PAGE of MpHSD, MpHCS and MpSDH elutions. **A.** Topology of expression cassette and plasmid used for the heterologous expression of MpHSD as detected after HIS-tag purification and SDS PAGE as a band of 81 kDa (lane E1 black arrow). **B.** Topology of expression cassette and plasmid used for the heterologous expression of MpHCS as detected after HIS-tag purification and SDS PAGE as a band of 51 kDa (lane E1 black arrow). **C.** Topology of expression cassette and plasmid used for the heterologous expression of MpSDH as detected after HIS-tag purification and SDS PAGE as a band of 41 kDa (lane E1 black arrow). The expression cassettes with *mphsd* and *mphcs* CDS were flanked by the oligonucleotide sites, while *mpsdh* CDS was flanked by restriction enzymes. Cropped pictures from three different SDS-PAGE gels are shown. Full-length (uncropped) gels are presented in Supplementary Fig. S2.

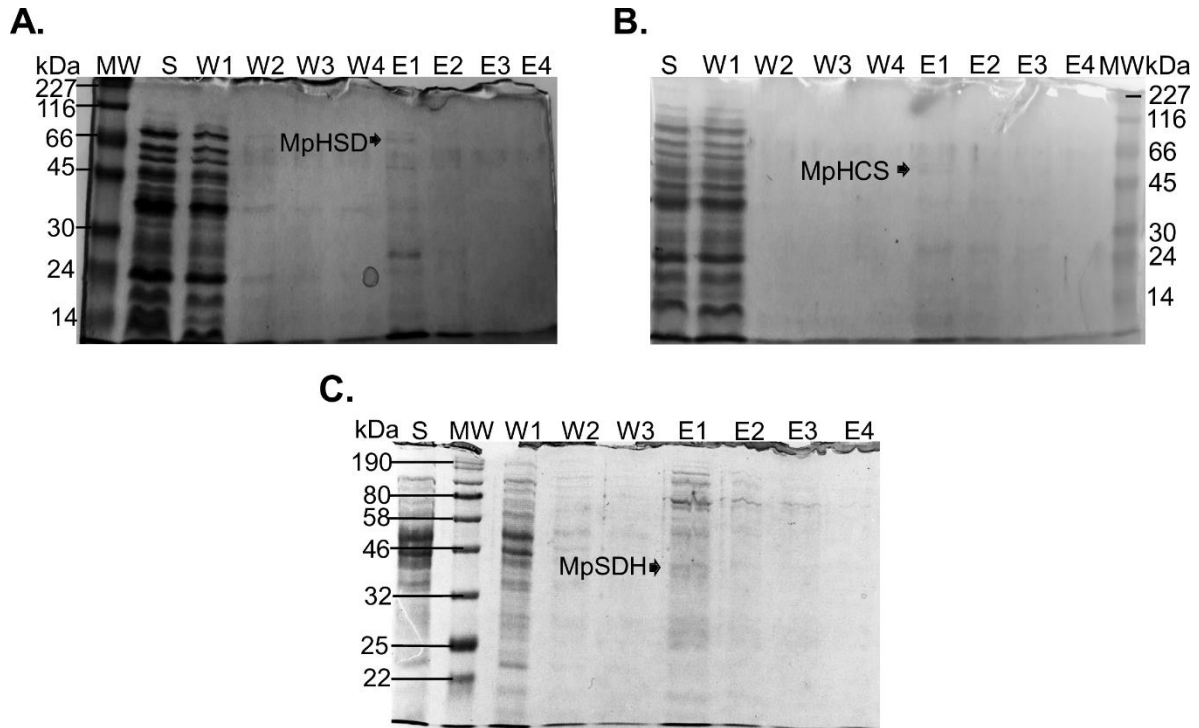

31  
32

33 **Supplementary Figure S2.** Full-length SDS-PAGE gels for purified expressed proteins **(A)** from  
 34 *E. coli* BL21 with pET6xHN-N-*mphsd*; **(B)** from *E. coli* BL21 with pET6xHN-N-*mphcs* and **(C)** from  
 35 *E. coli* BL21 with pET6xHN-N-*mpsdh*. Enzymes of interest indicated with black arrows. MW,  
 36 molecular weight; S, sample; W, washed; E, elution. Full-length (uncropped) gels are presented.  
 37 Pictures were recorded using a Gel Doc™ EZ System (Bio-Rad Laboratories, USA).



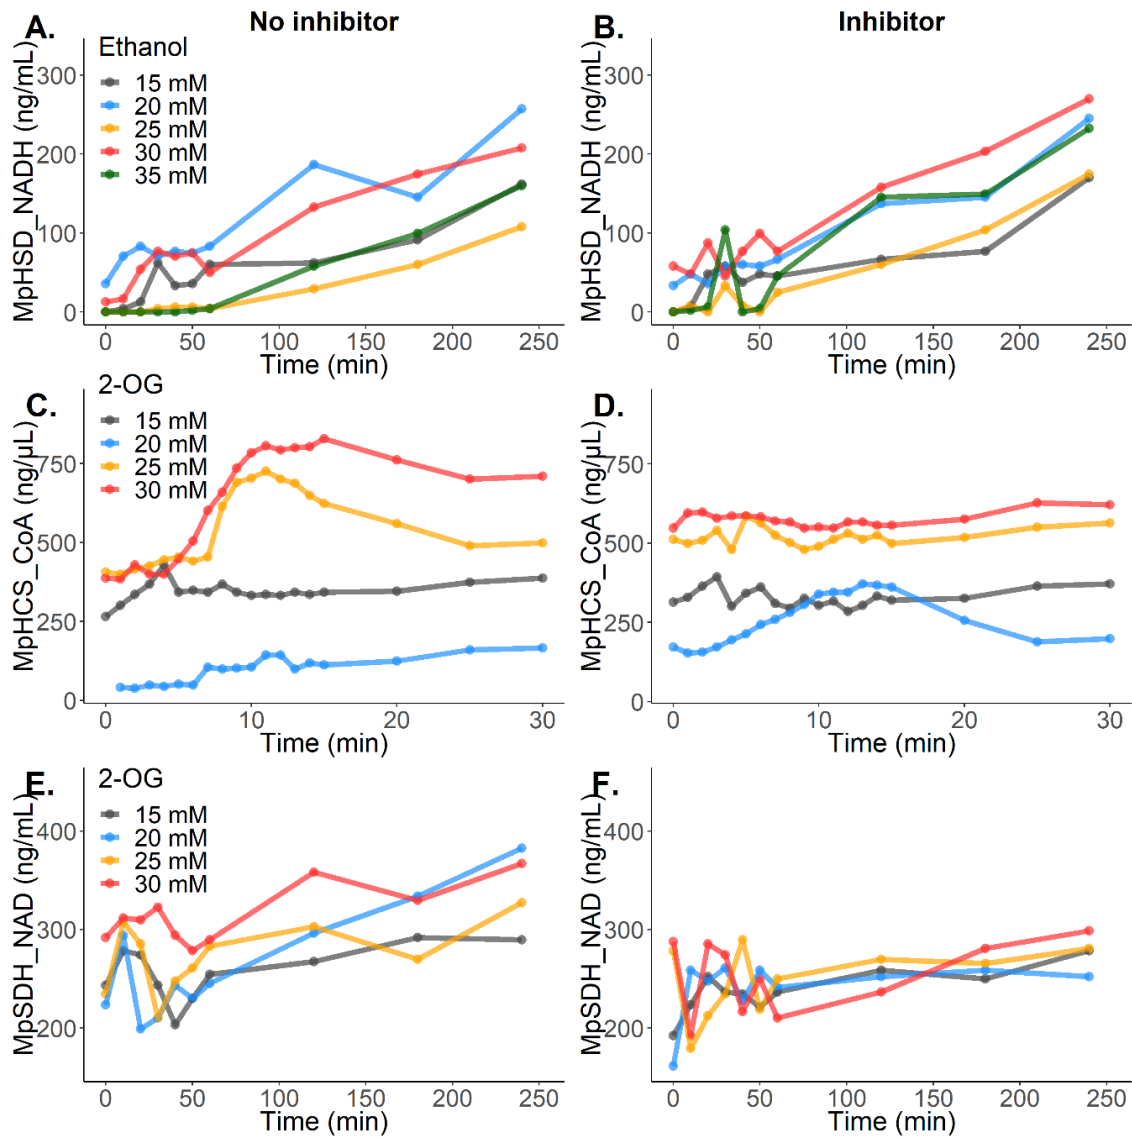

**Supplementary Figure S3.** Evaluation of the inhibitory capacity of amino acids upon candidates as therapeutic targets. **A.** Enzymatic activity of HSD with ethanol as substrate and NADH as reaction indicator. **B.** Enzymatic activity of HSD with ethanol as substrate, NADH as reaction indicator and L-threonine 1 mM as an inhibitor. **C.** Enzymatic activity of HCS with 2-OG as substrate and CoA as reaction indicator. **D.** Enzymatic activity of HCS with 2-OG as substrate, CoA as reaction indicator and L-lysine 1 mM as inhibitor. **E.** Enzymatic activity of SDH with 2-OG as substrate and NAD as reaction indicator. **F.** Enzymatic activity of SDH with 2-OG as substrate, NAD as reaction indicator and L-lysine 75 mM as inhibitor. Representative results of two biological replicates.

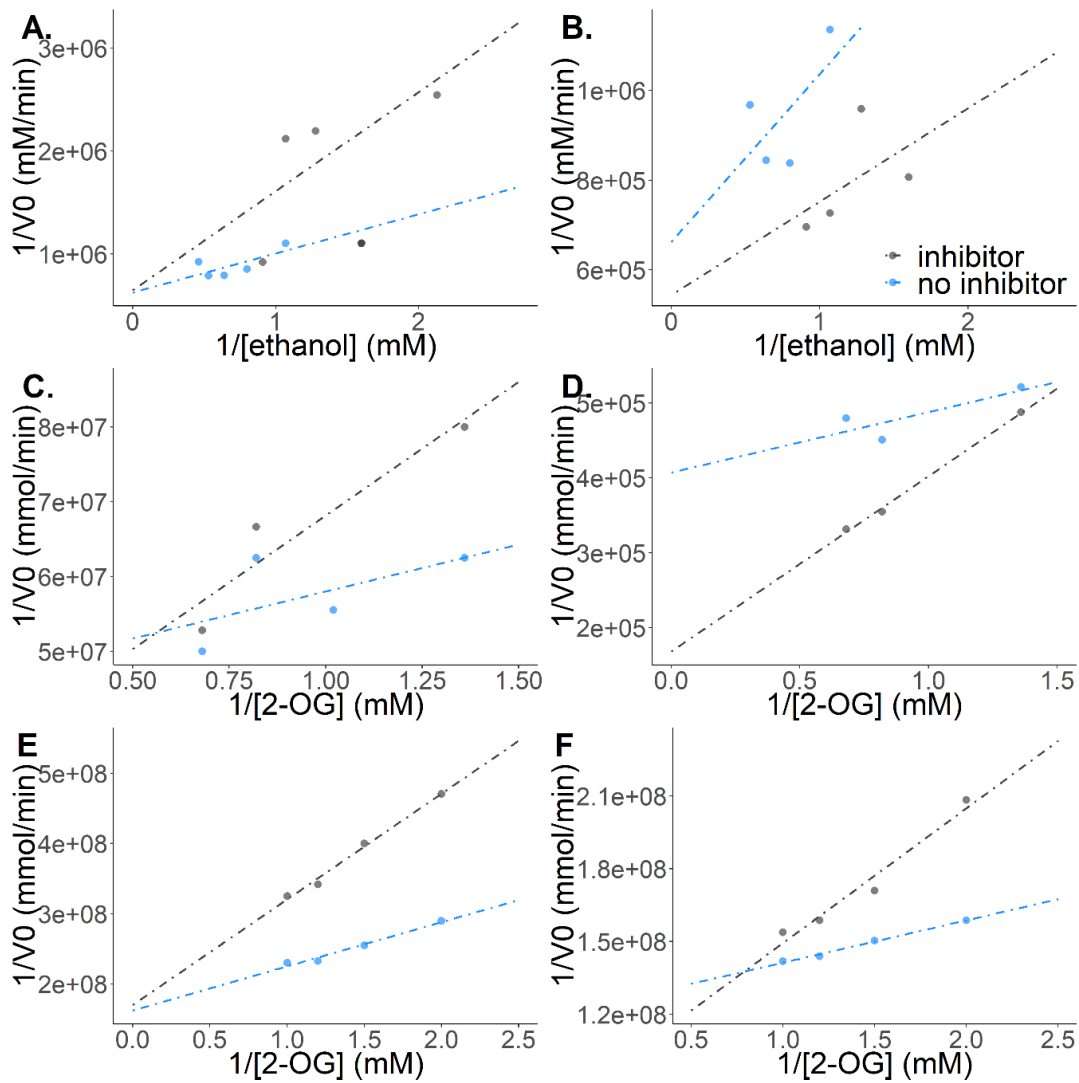

**Supplementary Figure S4.** Analysis of enzymatic activity assays by *Lineweaver-Burk* diagrams. **A., B.** Initial velocity pattern obtained for ethanol in different concentrations with NAD and MpHSD in a fixed concentration, compared to the inhibition of the substrate in the presence of 1 mM L-threonine. **C.,D.** Initial velocity pattern obtained for 2-OG in different concentrations with AcetylCoA and MpHCS at a fixed concentration, compared to substrate inhibition in the presence of 1 mM L-lysine. **E.,F.** Initial velocity pattern for 2-OG in different concentrations with NADH and MpSDH at a fixed concentration, compared to substrate inhibition in the presence of 75 mM L-lysine. The data shown are values for two biological replicates of each enzyme.

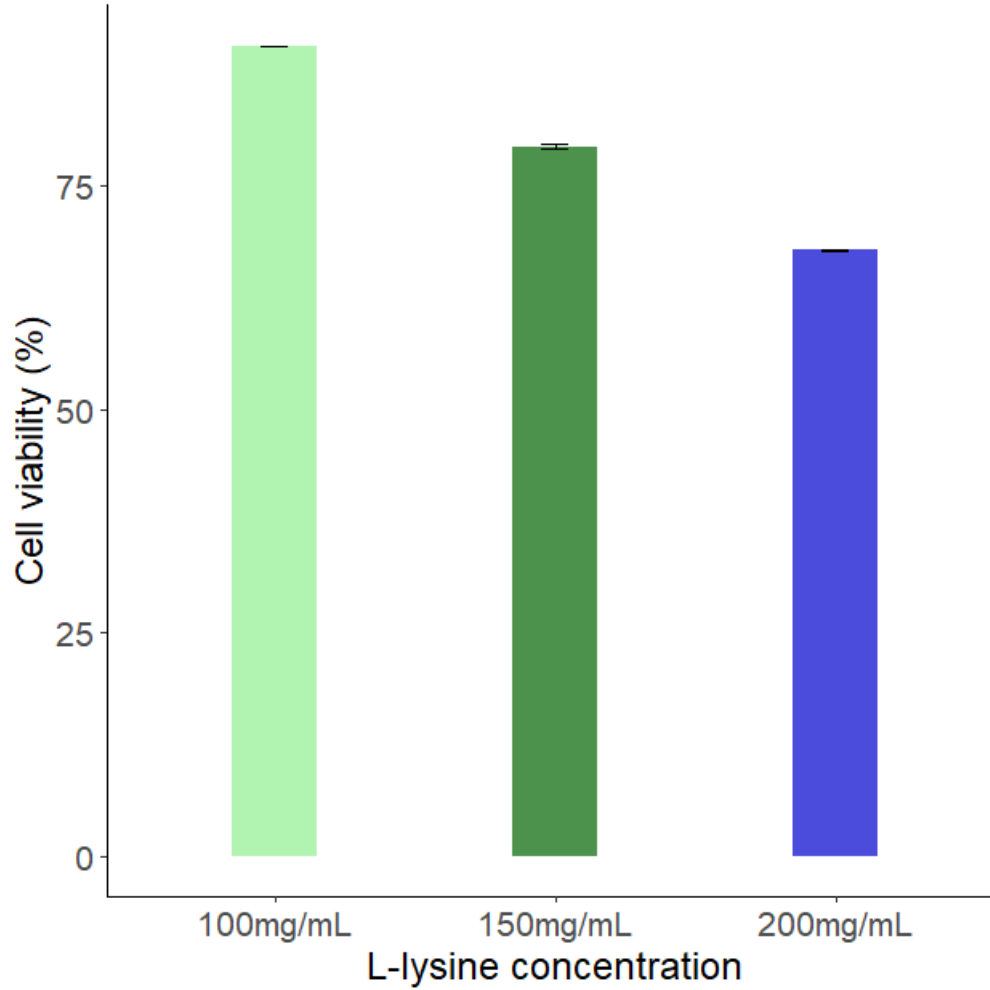

**Supplementary Figure S5.** MTT cell viability assay evaluating the cytotoxic activity of L-lysine on HEK293 cells. The viability percentage with standard deviations is shown for each concentration. Experiments were performed 3 times.
